# Supplementary material
Source: Copernicus journal article supplement (doi:10.5194/egusphere-2026-1043)
Supplement: Supplementary file 1 [file egusphere-2026-1043-supplement.pdf]

# Supplementary material for Lagrangian investigation into the representation of aerosol size distribution in climate models during the 2014-15 Holuhraun eruption.

## Table of Contents

|                                                                              |    |
|------------------------------------------------------------------------------|----|
| <i>S1 Supplementary Methods</i> .....                                        | 2  |
| S1.1 Data references.....                                                    | 2  |
| S1.2 Particle number size distribution data filters.....                     | 3  |
| S1.3 GCM aerosol modes.....                                                  | 5  |
| S1.4 Trajectory start heights.....                                           | 6  |
| S1.5 Clustering .....                                                        | 6  |
| <i>S2 Supplementary Results</i> .....                                        | 7  |
| S2.1 Aerosol size distribution time series.....                              | 7  |
| S2.2 NMBF results .....                                                      | 10 |
| S2.3 Perturbation of aerosol size distribution compared to climatology ..... | 11 |
| S2.4 Transport.....                                                          | 13 |
| S2.5 Potential impact on cloud microphysics .....                            | 14 |

## S1 Supplementary Methods

### S1.1 Data references

|                          |                   |                                                                                                                                                                                                                |
|--------------------------|-------------------|----------------------------------------------------------------------------------------------------------------------------------------------------------------------------------------------------------------|
| Pallas<br>(Matorova)     | September<br>2014 | Makkonen, U. EMEP, 2013-2015, Inorganics in air and particle phase at Pallas (Matorova), data hosted by EBAS at NILU, DOI: <a href="https://doi.org/10.48597/PPB3-N5YU">https://doi.org/10.48597/PPB3-N5YU</a> |
| Zeppelin<br>(Ny-Ålesund) | September<br>2014 | From personal correspondence with Ove Hermansen at NILU (Norwegian Institute for Air Research)                                                                                                                 |

**Table S1:** References for the SO<sub>2</sub> measurements.

|                           |           |                                                                                                                                                                                                                                                               |
|---------------------------|-----------|---------------------------------------------------------------------------------------------------------------------------------------------------------------------------------------------------------------------------------------------------------------|
| Värriö                    | 2009-2014 | Kulmala, M., Aalto, P., ACTRIS, GAW-WDCA, EMEP, 2000-2016, Particle_number_size_distribution at Värriö, data hosted by EBAS at NILU, DOI: <a href="https://doi.org/10.48597/GCM5-XUH5">https://doi.org/10.48597/GCM5-XUH5</a>                                 |
| Pallas<br>(Sammaltunturi) | 2009-2014 | Kivekäs, N. GAW-WDCA, EUSAAR, EMEP, ACTRIS, CREATE, 2008-2011, Particle_number_size_distribution at Pallas (Sammaltunturi), data hosted by EBAS at NILU, DOI: <a href="https://doi.org/10.48597/DS2W-2XKG">https://doi.org/10.48597/DS2W-2XKG</a>             |
|                           | 2012-2014 | Kivekäs, N., Seppälä, S., Hyvärinen, A. GAW-WDCA, ACTRIS, EMEP, 2012-2021, Particle_number_size_distribution at Pallas (Sammaltunturi), data hosted by EBAS at NILU, DOI: <a href="https://doi.org/10.48597/5PPZ-42F4">https://doi.org/10.48597/5PPZ-42F4</a> |
| Zeppelin<br>(Mountain)    | 2010-2014 | Tunved, P. ACTRIS, GAW-WDCA, 2010-2021, Particle_number_size_distribution at Zeppelin Mountain (Ny-Ålesund), data hosted by EBAS at NILU, DOI: <a href="https://doi.org/10.48597/REFE-7BYF">https://doi.org/10.48597/REFE-7BYF</a>                            |

**Table S2:** References for the ACTRIS PNSD measurements.

## S1.2 Particle number size distribution data filters

Filter removal rates for each yearly aerosol file are shown for Värriö in Table S3, Pallas in Table S4 and Zeppelin in Table S5.

| Year | Datapoints at start | Percentage of empty distributions at start | Percentage points removed for 1 | Percentage points removed for 2 | Percentage points removed for 3 | Percentage points removed for 4 |
|------|---------------------|--------------------------------------------|---------------------------------|---------------------------------|---------------------------------|---------------------------------|
| 2009 | 8760                | 27.52                                      | 2.37                            | 0                               | 0.20                            | 0.5                             |
| 2010 | 8760                | 75.32                                      | 0                               | 0                               | 0.00                            | 0.5                             |
| 2011 | 8760                | 2.5                                        | 22.8                            | 0                               | 0.66                            | 0.5                             |
| 2012 | 8784                | 1.04                                       | 4.08                            | 0                               | 0.40                            | 0.5                             |
| 2013 | 8760                | 1.39                                       | 5.77                            | 0                               | 0.21                            | 0.5                             |
| 2014 | 8760                | 3.54                                       | 0                               | 0                               | 0.56                            | 0.5                             |

**Table S3:** The percentage of datapoints removed from each yearly aerosol file by each filter for Värriö. Filtering conducted on the full timeseries from 2009-2014.

| Year | Datapoints at start | Percentage of empty distributions at start | Percentage points removed for 1 | Percentage points removed for 2 | Percentage points removed for 3 | Percentage points removed for 4 |
|------|---------------------|--------------------------------------------|---------------------------------|---------------------------------|---------------------------------|---------------------------------|
| 2009 | 8760                | 44.71                                      | 0                               | 0                               | 0.18                            | 0.5                             |
| 2010 | 8760                | 38.36                                      | 0                               | 0                               | 0.41                            | 0.5                             |
| 2011 | 8760                | 51.28                                      | 0                               | 0                               | 0.55                            | 0.5                             |
| 2012 | 8784                | 99.36                                      | 0                               | 0                               | 0.00                            | 0.5                             |
| 2013 | 8760                | 40.70                                      | 0                               | 0                               | 0.67                            | 0.5                             |
| 2014 | 8760                | 39.57                                      | 0                               | 0                               | 1.19                            | 0.5                             |

**Table S4:** The percentage of datapoints removed from each yearly aerosol file by each filter for Pallas. Filtering conducted on statistics from the full timeseries 2009-2014.

| Year | Datapoints at start | Number of empty distributions at start | Percentage points removed for 1 | Percentage points removed for 2 | Percentage points removed for 3 | Percentage points removed for 4 |
|------|---------------------|----------------------------------------|---------------------------------|---------------------------------|---------------------------------|---------------------------------|
| 2010 | 8760                | 70.23                                  | 0                               | 0                               | 0.02                            | 0.5                             |
| 2011 | 8760                | 43.63                                  | 0                               | 0                               | 0.40                            | 0.5                             |
| 2012 | 8784                | 13.31                                  | 0                               | 0                               | 1.05                            | 0.5                             |
| 2013 | 8760                | 11.53                                  | 0                               | 0                               | 0.38                            | 0.5                             |
| 2014 | 8760                | 49.63                                  | 0                               | 0                               | 0.10                            | 0.5                             |

**Table S5:** The percentage of datapoints removed from each yearly aerosol file by each filter for Zeppelin. Filtering conducted on statistics from the full timeseries 2010-2014.

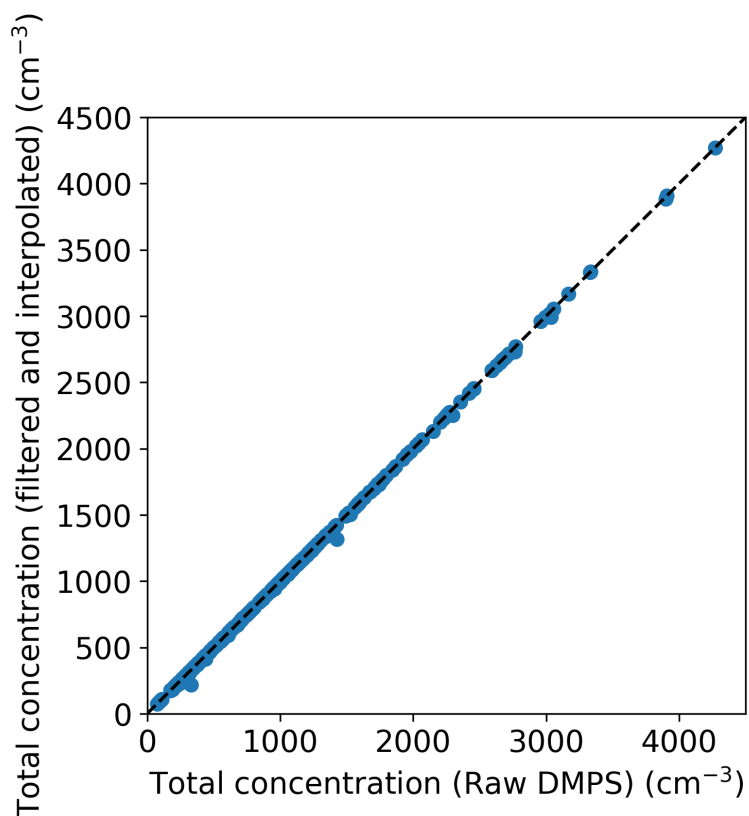

**Figure S1:** Total concentration for September 2014 at Värriö for the raw DMPS measurements compared to the filtered and interpolated PNSD.

### S1.3 GCM aerosol modes

| <b>Aerosol mode</b>  | <b>Species</b>               | <b>Diameter (nm)</b> | <b>Geometric standard deviation (<math>\sigma</math>)</b> |
|----------------------|------------------------------|----------------------|-----------------------------------------------------------|
| Nucleation soluble   | SO <sub>4</sub> , OM         | 1–10                 | 1.59                                                      |
| Aitken soluble       | SO <sub>4</sub> , BC, OM     | 10–100               | 1.59                                                      |
| Accumulation soluble | SO <sub>4</sub> , BC, OM, SS | 100–500              | 1.40                                                      |
| Coarse soluble       | SO <sub>4</sub> , BC, OM, SS | 500–10000            | 2.00                                                      |
| Aitken insoluble     | BC, OM                       | 10–100               | 1.59                                                      |

**Table S6:** UKESM1.0 aerosol mode descriptions. Species comprise sulphate (SO<sub>4</sub>), organic matter (OM), black carbon (BC) and sea salt (SS).

| <b>Aerosol mode</b>    | <b>Species</b>               | <b>Diameter (nm)</b> | <b>Geometric standard deviation (<math>\sigma</math>)</b> |
|------------------------|------------------------------|----------------------|-----------------------------------------------------------|
| Nucleation soluble     | SO <sub>4</sub> ,            | < 10                 | 1.59                                                      |
| Aitken soluble         | SO <sub>4</sub> , OC, BC     | 10–100               | 1.59                                                      |
| Accumulation soluble   | SO <sub>4</sub> , OC, BC, SS | 100–1000             | 1.59                                                      |
| Coarse soluble         | SO <sub>4</sub> , OC, BC, SS | >1000                | 2.00                                                      |
| Aitken insoluble       | OC, BC                       | 10–100               | 1.59                                                      |
| Accumulation insoluble | Dust                         | 100–1000             | 1.59                                                      |
| Coarse insoluble       | Dust                         | >1000                | 2.00                                                      |

**Table S7:** ECHAM6.3-HAM2.3 aerosol mode descriptions. Components are as in Table 2.1, but OC here is used to represent organic matter rather than organic carbon (OC).

## S1.4 Trajectory start heights

| Station | Altitude (m a.s.l.) | ERA-Int difference | UKESM difference | ECHAM difference | Average offset | Height above ground level used (to the nearest 50m) |
|---------|---------------------|--------------------|------------------|------------------|----------------|-----------------------------------------------------|
| VAR     | 390                 | 142.9              | 180.4            | 142.7            | 155.6          | 150                                                 |
| PAL     | 565                 | 269.7              | 192.9            | 191.8            | 218.1          | 200                                                 |
| ZEP     | 472                 | 288.6              | 333.8            | 362.9            | 328.4          | 350                                                 |

**Table S8:** Altitude of station compared to the orography at that point for each dataset (ERA-Interim, UKESM1.0, ECHAM6.3-HAM2.3). The mean of the offsets between the datasets is then used to select the height above ground level used (to the nearest 50m).

## S1.5 Clustering

The ‘Elbow’ method was employed to select the number of clusters based on the decrease of within-cluster sum of squares (WCSS).

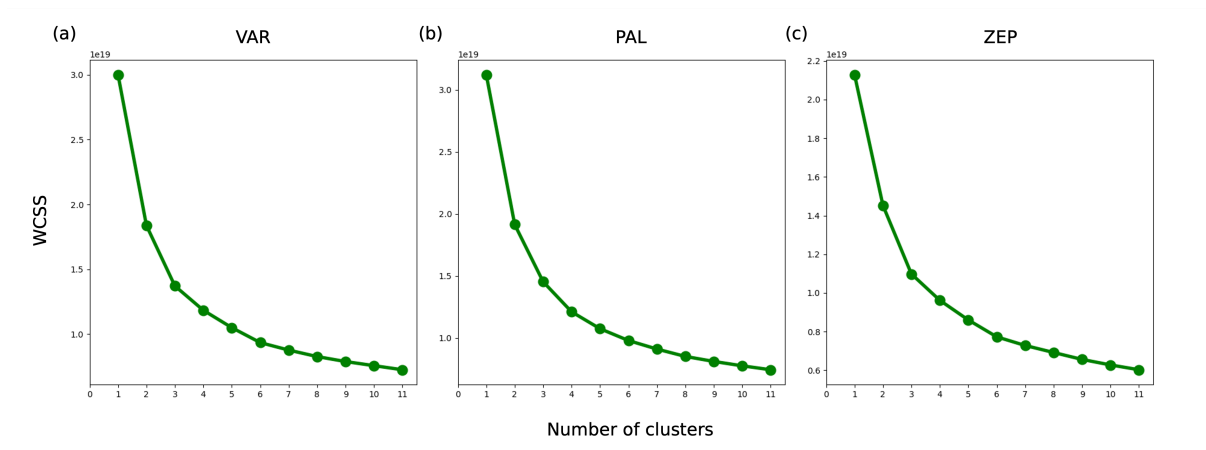

**Figure S2:** The within-cluster sum of squares (WCSS) for each number of clusters from 1-11 for each station (a) Värriö, (b) Pallas and (c) Zeppelin.

## S2 Supplementary Results

### S2.1 Aerosol size distribution time series

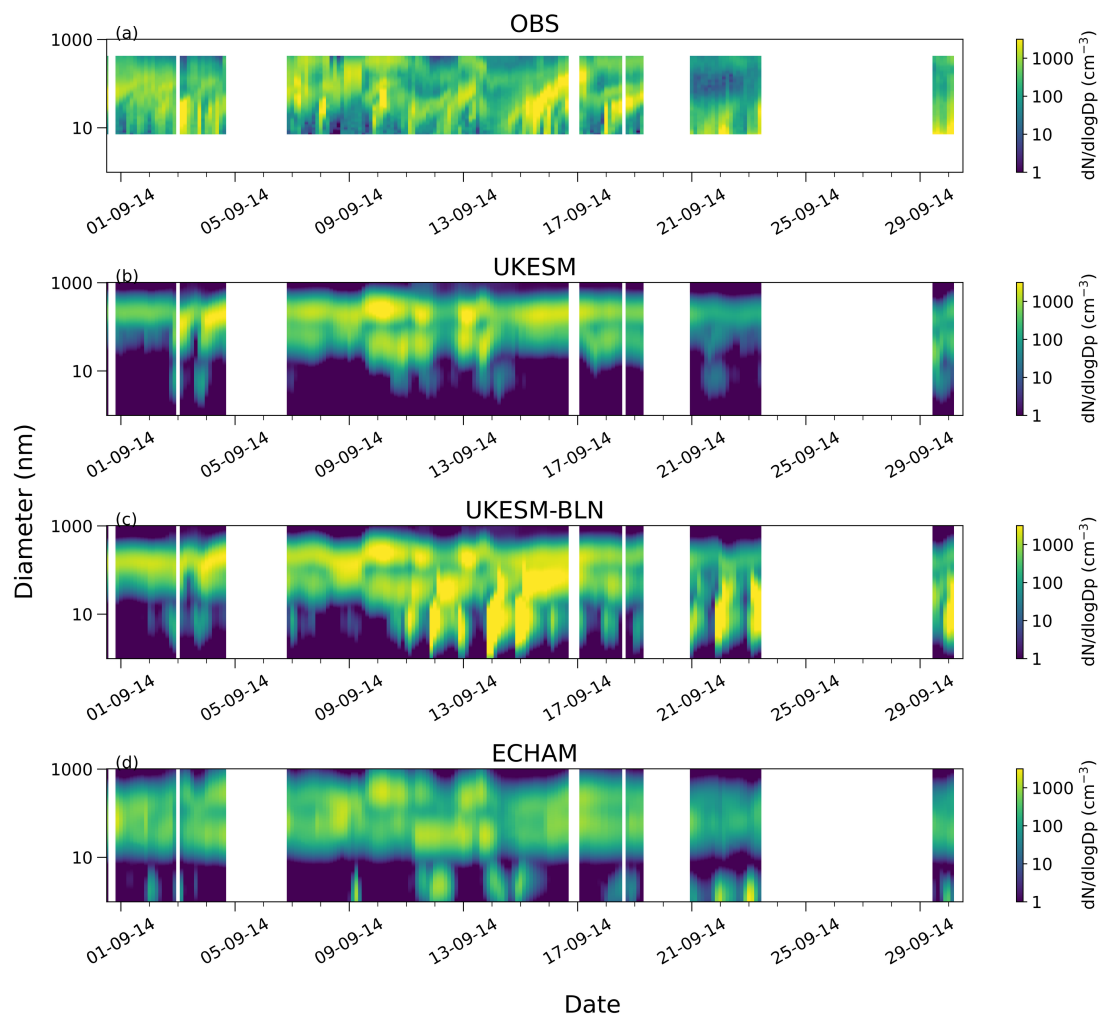

**Figure S3:** Timeseries of size distribution for September 2014 at Pallas in  $dN/d\log D_p$ . (a) observations (DMPS), (b) UKESM1.0, (c) UKESM1.0-BLN and (d) ECHAM6.3HAM2.3.

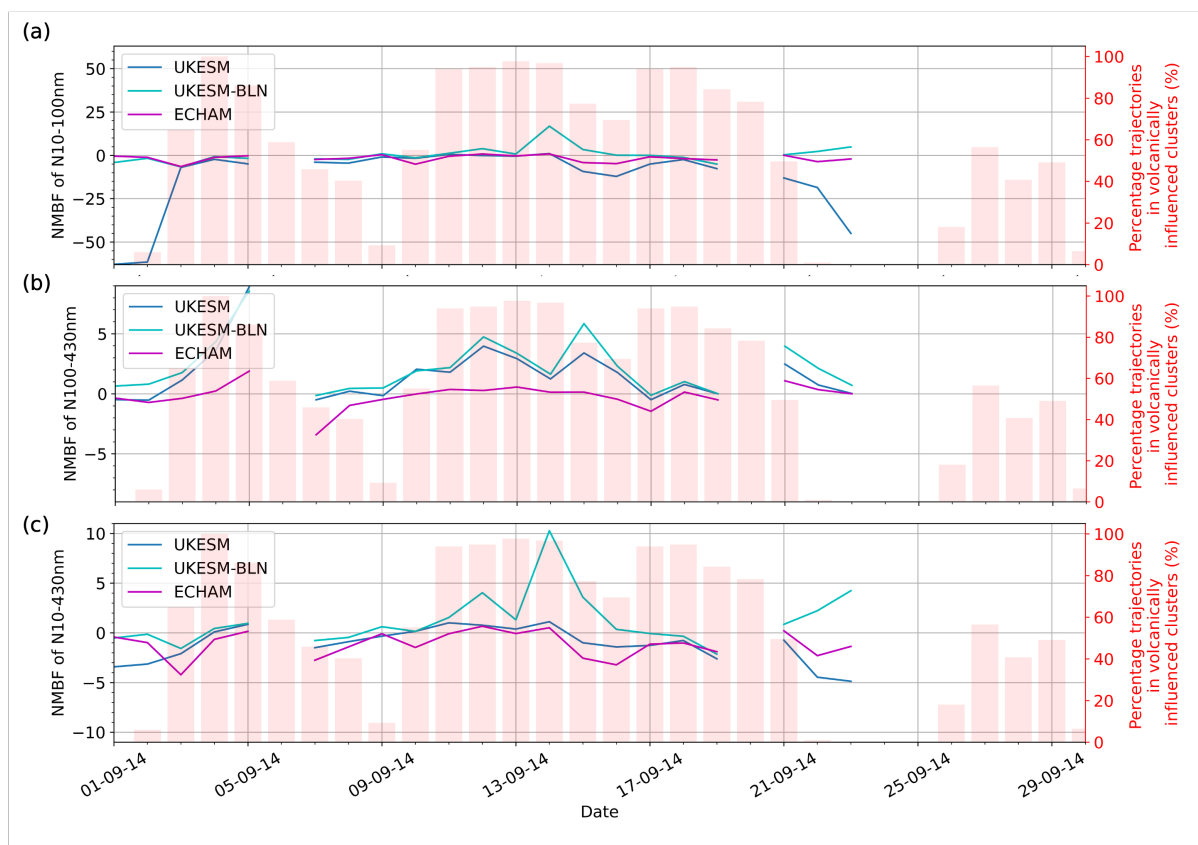

**Figure S4:** Timeseries of normalised mean bias factor (NMBF) (Eq. 4) per day during September 2014 at Pallas for the for different size ranges for each model compared to observations: (a) Aitken mode (10-100nm) (b) accumulation mode (100-430nm) and (c) total (10-430nm). UKESM1.0 is shown in blue, UKESM1.0-BLN in cyan and ECHAM6.3-HAM2.3 in magenta. The period which was found to be influenced by transport from the volcano from the clustering analysis (Sect. 2.7) is indicated by the red shading of the timeseries.

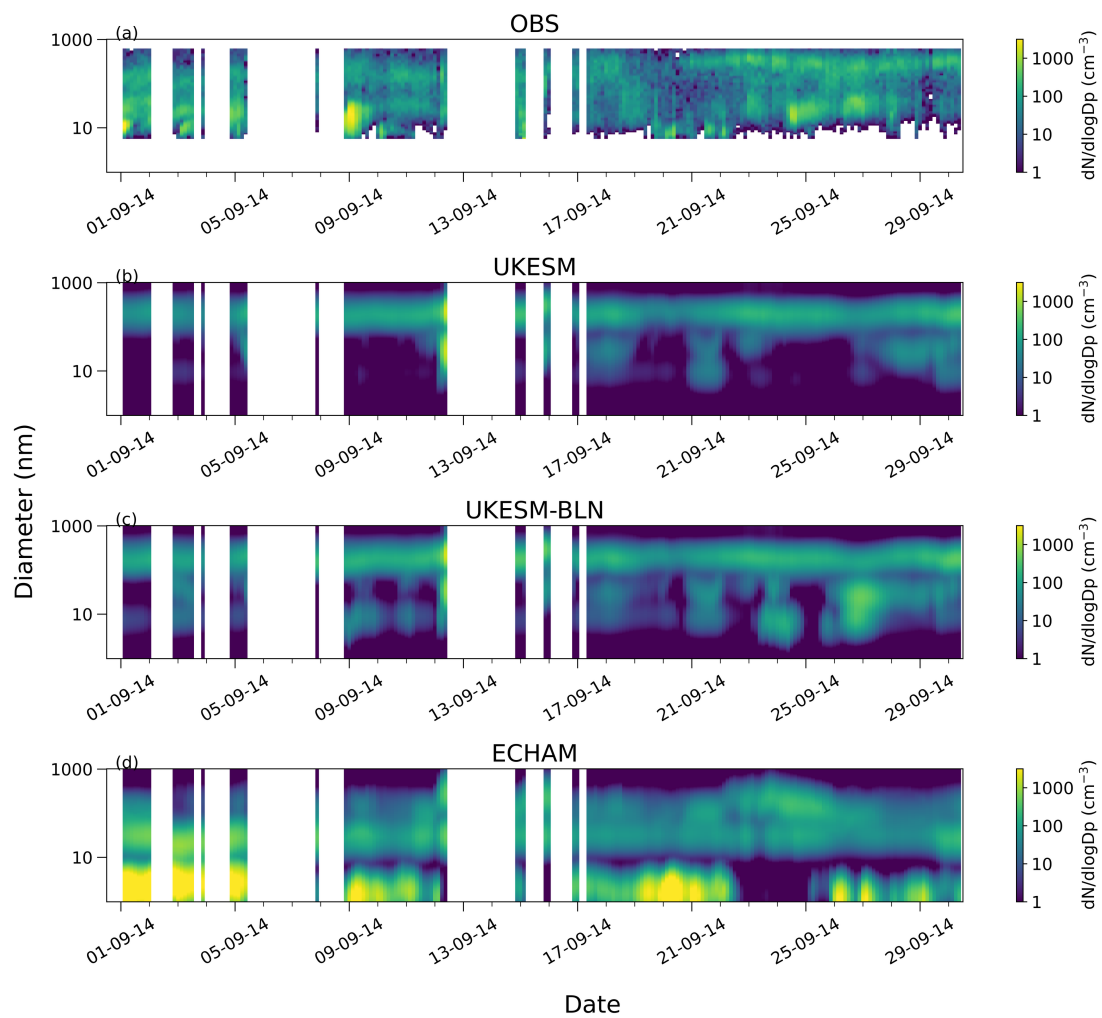

**Figure S5:** Timeseries of size distribution for September 2014 at Zeppelin in  $dN/d\log D_p$ . (a) observations (DMPS), (b) UKESM1.0, (c) UKESM1.0-BLN and (d) ECHAM6.3HAM2.3.

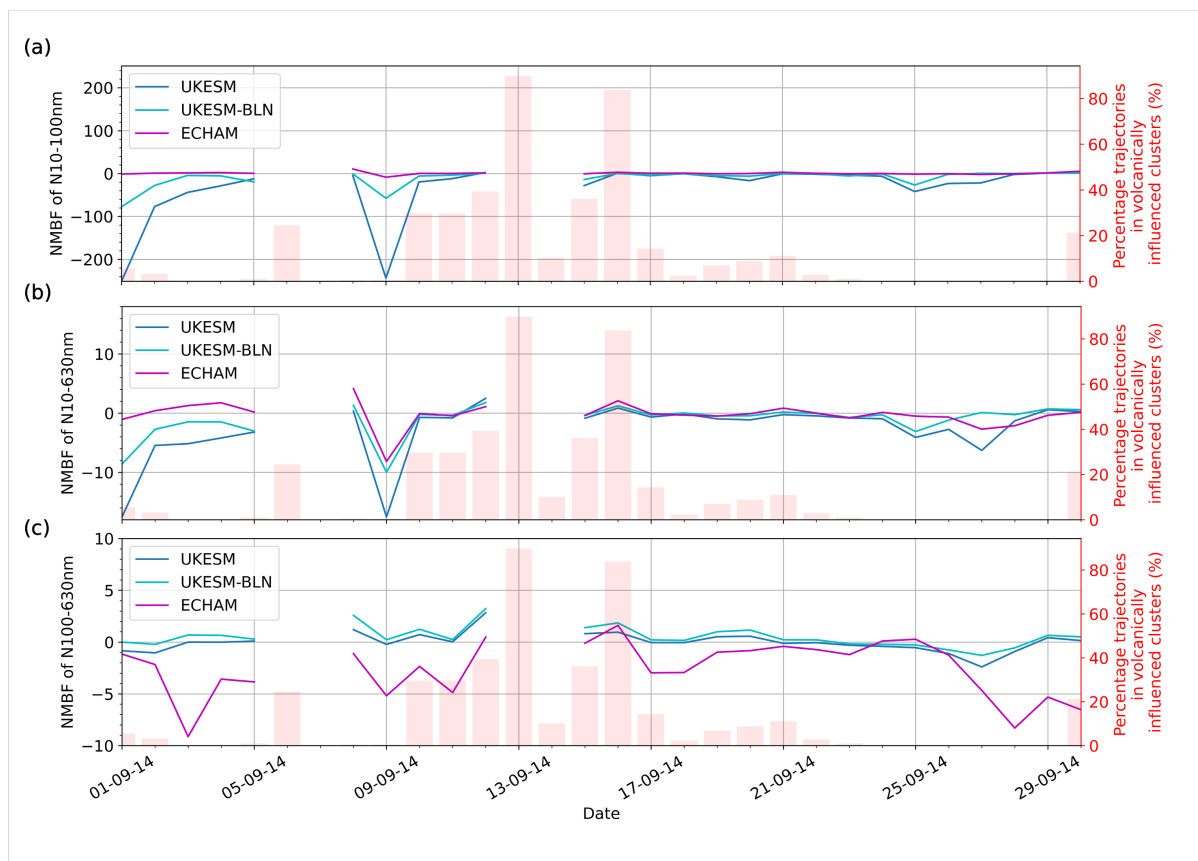

**Figure S6:** Timeseries of normalised mean bias factor (NMBF) (Eq. 4) per day during September 2014 at Zeppelin for the concentration for different size ranges for each model compared to observations: (a) Aitken mode (10-100nm) (b) accumulation mode (100-630nm) and (c) total (10-630nm). UKESM1.0 is shown in blue, UKESM1.0-BLN in cyan and ECHAM6.3-HAM2.3 in magenta. The period which was found to be influenced by transport from the volcano from the clustering analysis (Sect. 2.7) is indicated by the red shading of the timeseries.

## S2.2 NMBF results

|                  | Värriö (N10-790nm)              | Pallas (N10-430nm)              | Zeppelin (N10-630nm)            |
|------------------|---------------------------------|---------------------------------|---------------------------------|
| <b>UKESM</b>     | -0.67<br>1.67 (underestimation) | -0.46<br>1.46 (underestimation) | -1.24<br>2.24 (underestimation) |
| <b>UKESM-BLN</b> | 0.98<br>1.98 (overestimation)   | 0.69<br>1.69 (overestimation)   | -0.60<br>1.60 (underestimation) |
| <b>ECHAM</b>     | -0.77<br>1.77 (underestimation) | -0.97<br>1.97 (underestimation) | -0.28<br>1.28 (underestimation) |

**Table S9:** The normalised mean bias factor (NMBF) and model bias factor ( $1+|NMBF|$ ), demonstrating the factor by which each model overestimates or underestimates the total concentration compared to the observations during September 2014 at Värriö ( $D_p=10-790\text{nm}$ ), Pallas ( $D_p=10-430\text{nm}$ ) and Zeppelin ( $D_p=10-630\text{nm}$ ).

### S2.3 Perturbation of aerosol size distribution compared to climatology

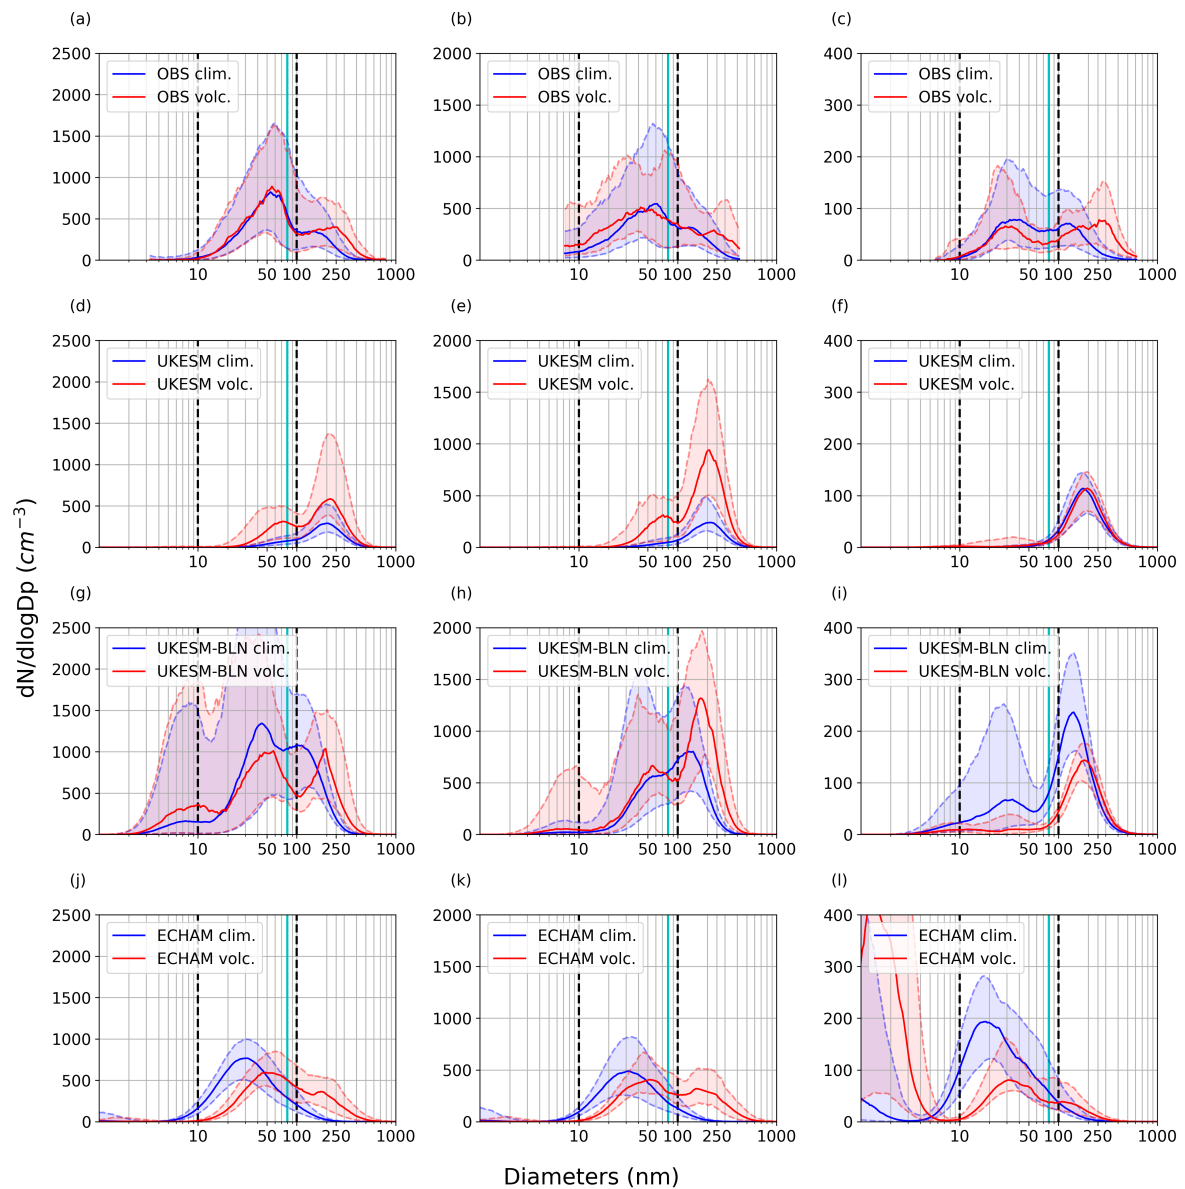

**Figure S7:** Average size distribution for September at each site. Top panel shows observations (DMPS), middle panel shows UKESM1.0 results and bottom panel shows ECHAM6.3HAM2.3. Red represents the eruption year (2014) and blue the climatology years (Värriö and Pallas: 2009-2013, Zeppelin: 2010-2013). Median indicated by solid line and 25th-75th percentiles by the shaded region.

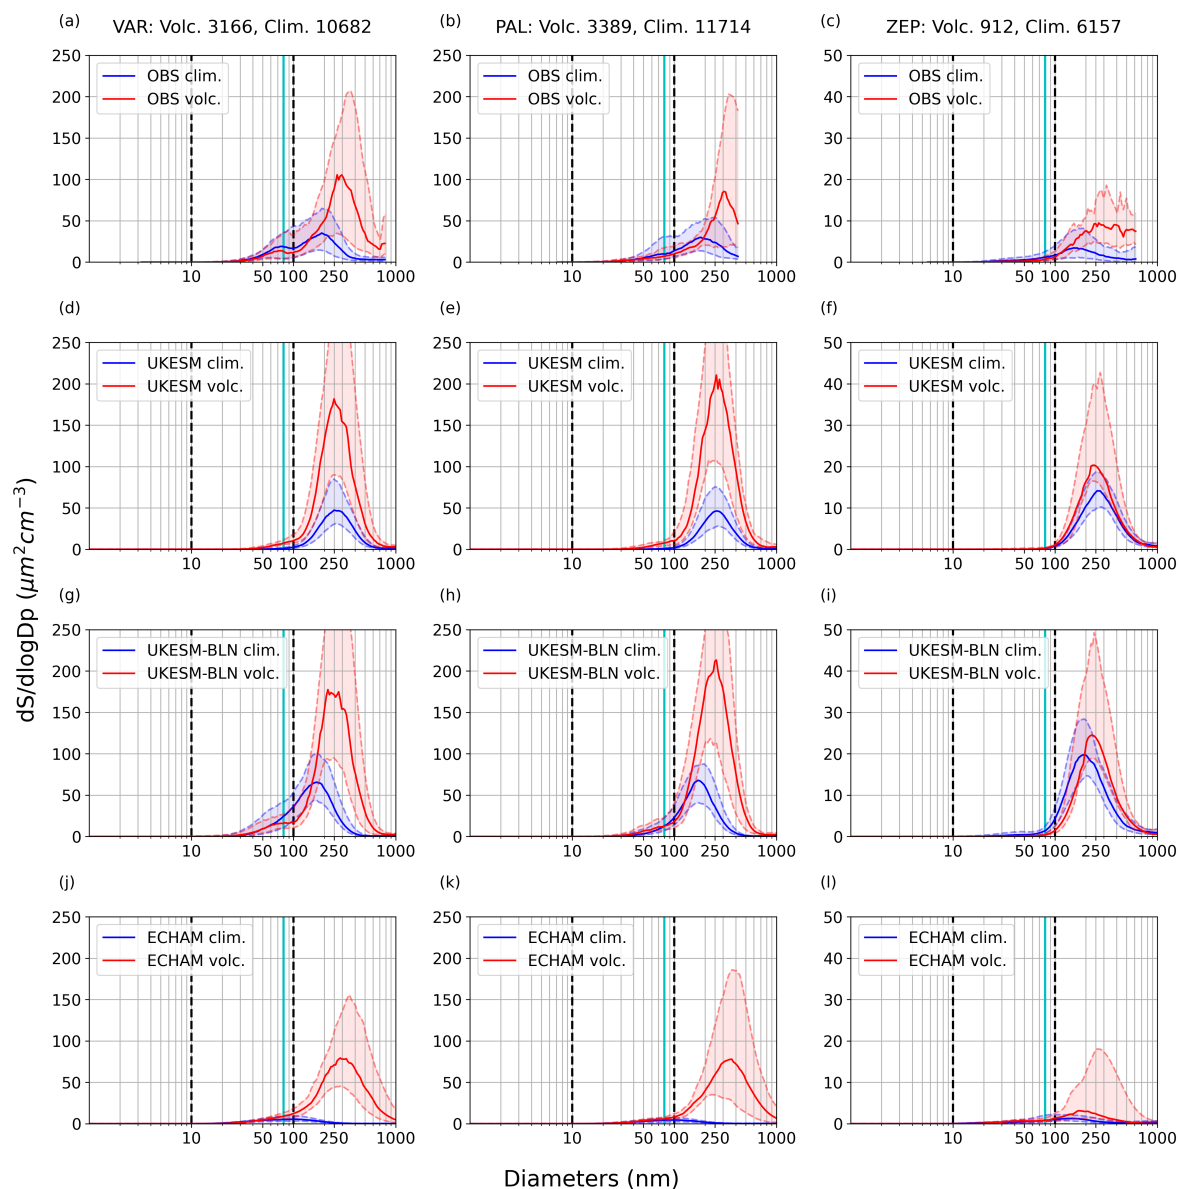

**Figure S8:** Average surface area ( $dS/d\log D_p$ ) distribution for September at each site. (a-c) Shows observations (DMPS), (d-f) UKESM1.0, (g-i) UKESM1.0-BLN and (j-l) ECHAM6.3-HAM2.3. Red represents the eruption year (2014) and blue the climatology years (Värriö and Pallas: 2009–2013, Zeppelin: 2010–2013). Median indicated by solid line and 25th–75th percentiles by the shaded region. The size distributions are averaged based on data arriving from the direction of Holuhraun, based on the selected clusters in Sect. 2.7. The number of trajectories included in each average is indicated in the title of each column for the climatology and eruption period. The black dotted vertical lines indicate the separation of modes in this study: 1–10 nm to represent the nucleation mode, 10–100 nm to represent the Aitken mode and 100–800 nm to represent the accumulation mode. The cyan vertical lines indicate the 80 nm threshold used as a proxy for CCN in this study.

## S2.4 Transport

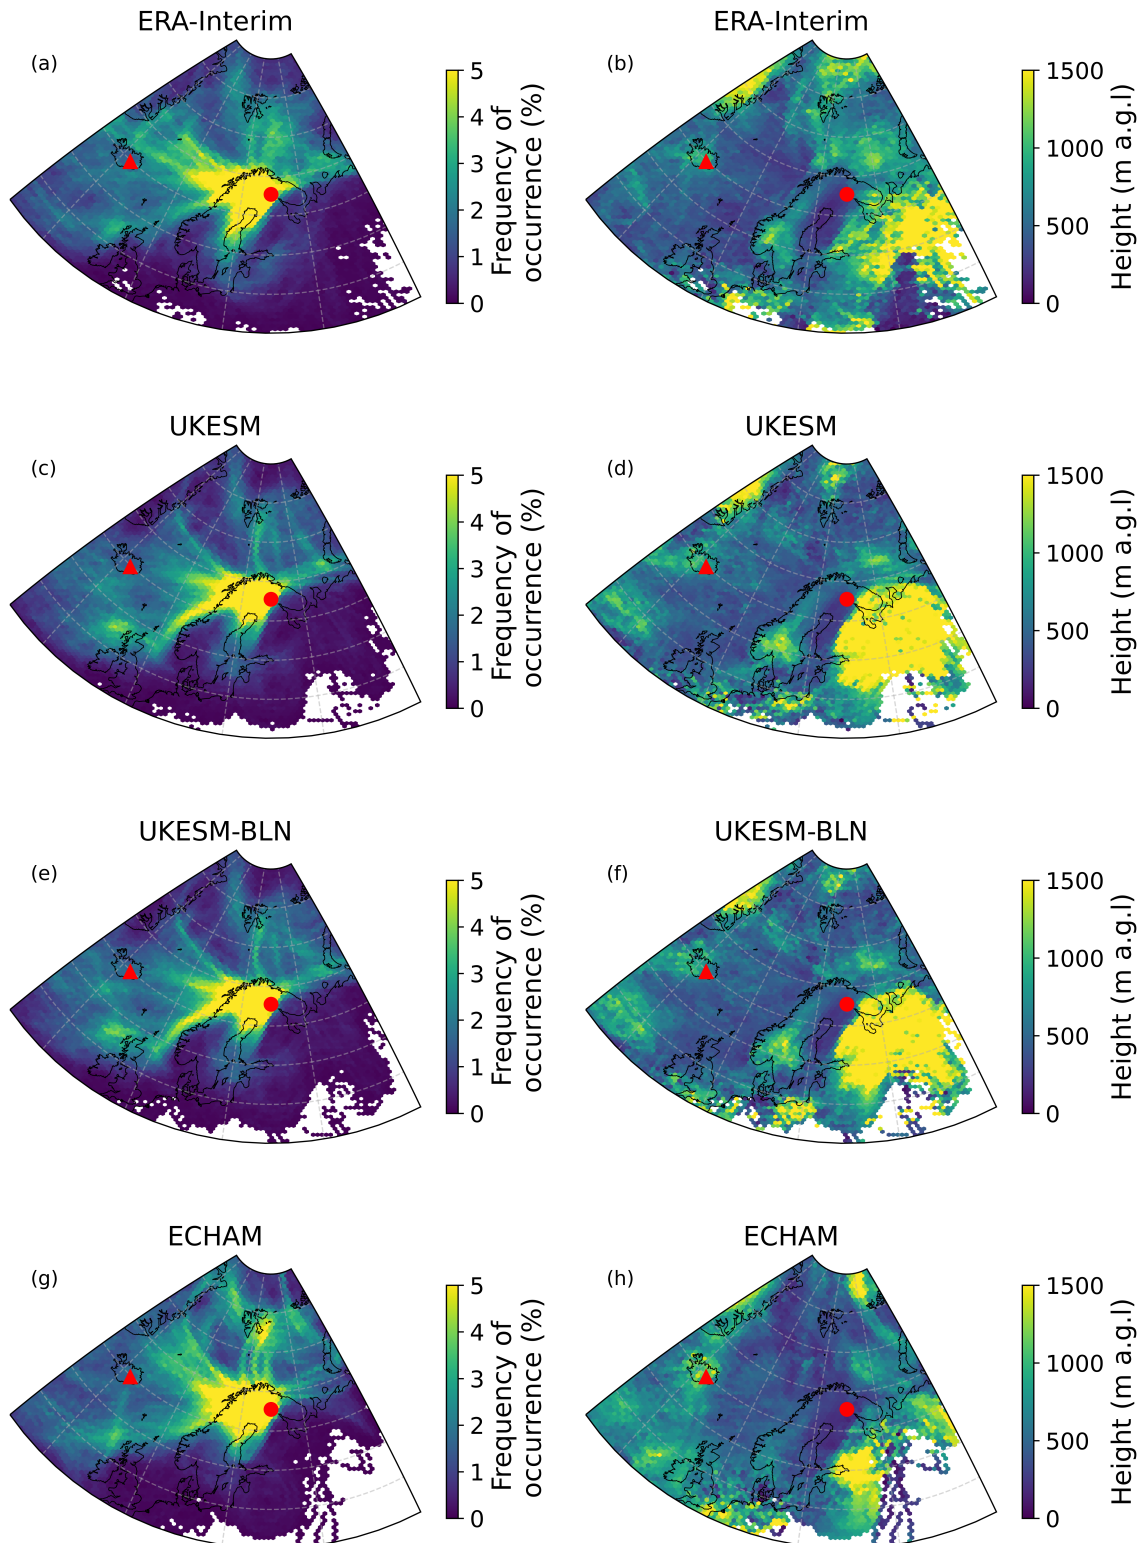

**Figure S9:** The transport frequency receptor models (a, c, e and g) (Eq. 1) as well as the average height (a.g.l.) (b, d, f and h) for back trajectories passing through a grid cell, calculated using the CVT receptor model (Eq. 3). For all trajectories initialised at Värriö during September 2014, for ERA-Interim (a-b), UKESM1.0 (c-d), UKESM1.0-BLN (e-f) and ECHAM6.3-HAM2.3 (g-h).

## S2.5 Potential impact on cloud microphysics

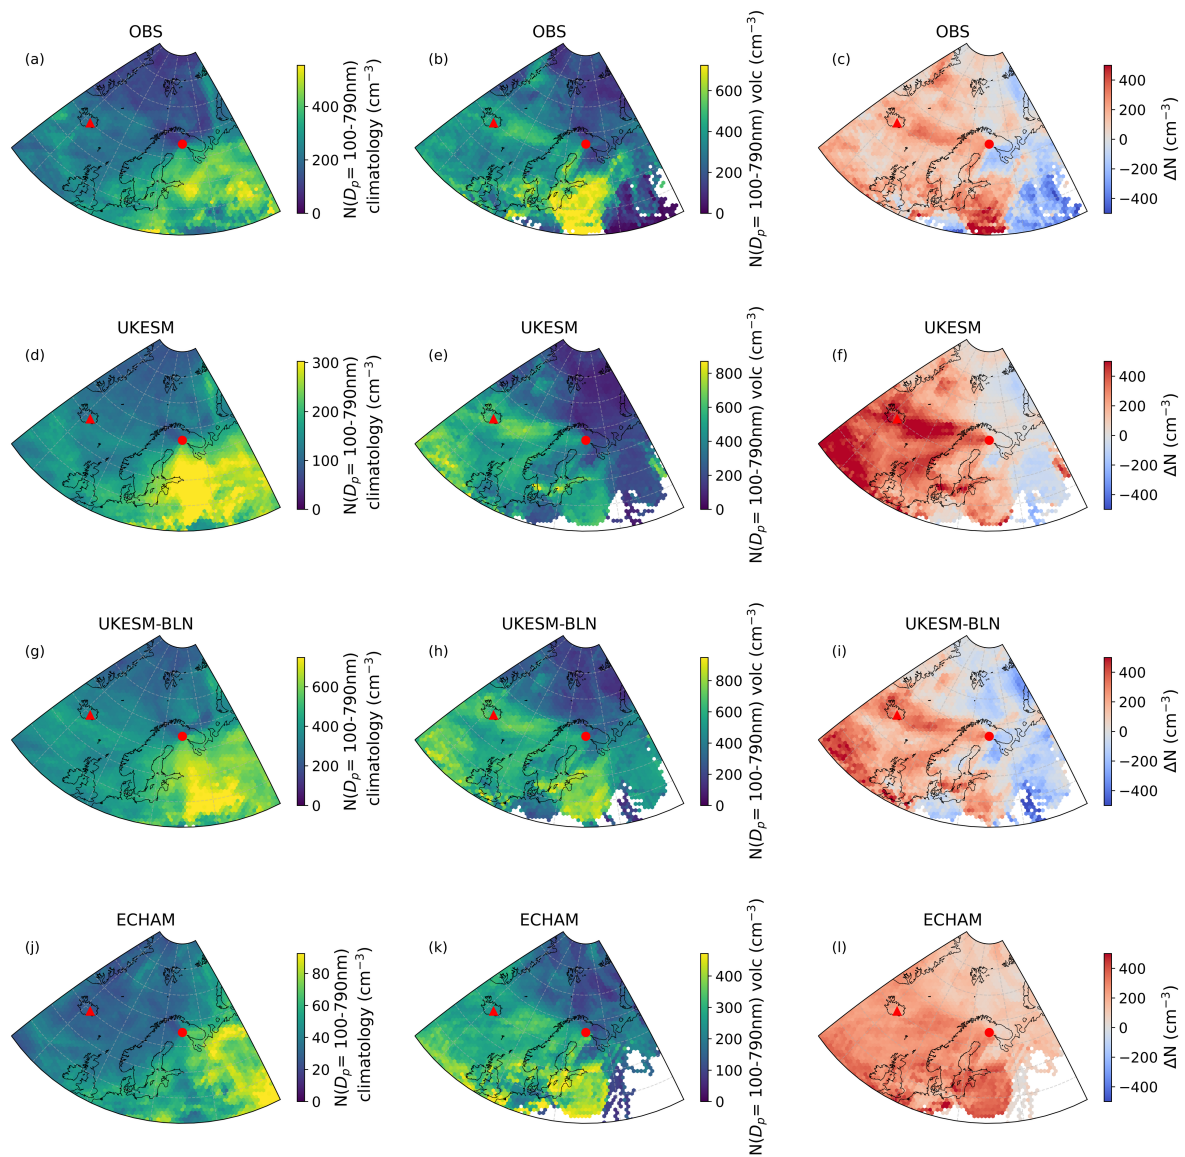

**Figure S10:** The mean per grid cell for the concentration of particles for  $D_p > 100\text{nm}$  ( $N_{100}$ ) at Värriö for the climatology (a, d, g and j), volcanic period (b, e, h and k) and the difference (volcanic period minus climatology) in concentration (c, f, i and l), utilising the concentration weighted trajectory model. For DMPS with ERA-Interim (a-c), UKESM1.0 (d-f), UKESM1.0-BLN10 (g-i) and ECHAM6.3-HAM2.3 (j-l). Note the difference in colour scale between subfigures.

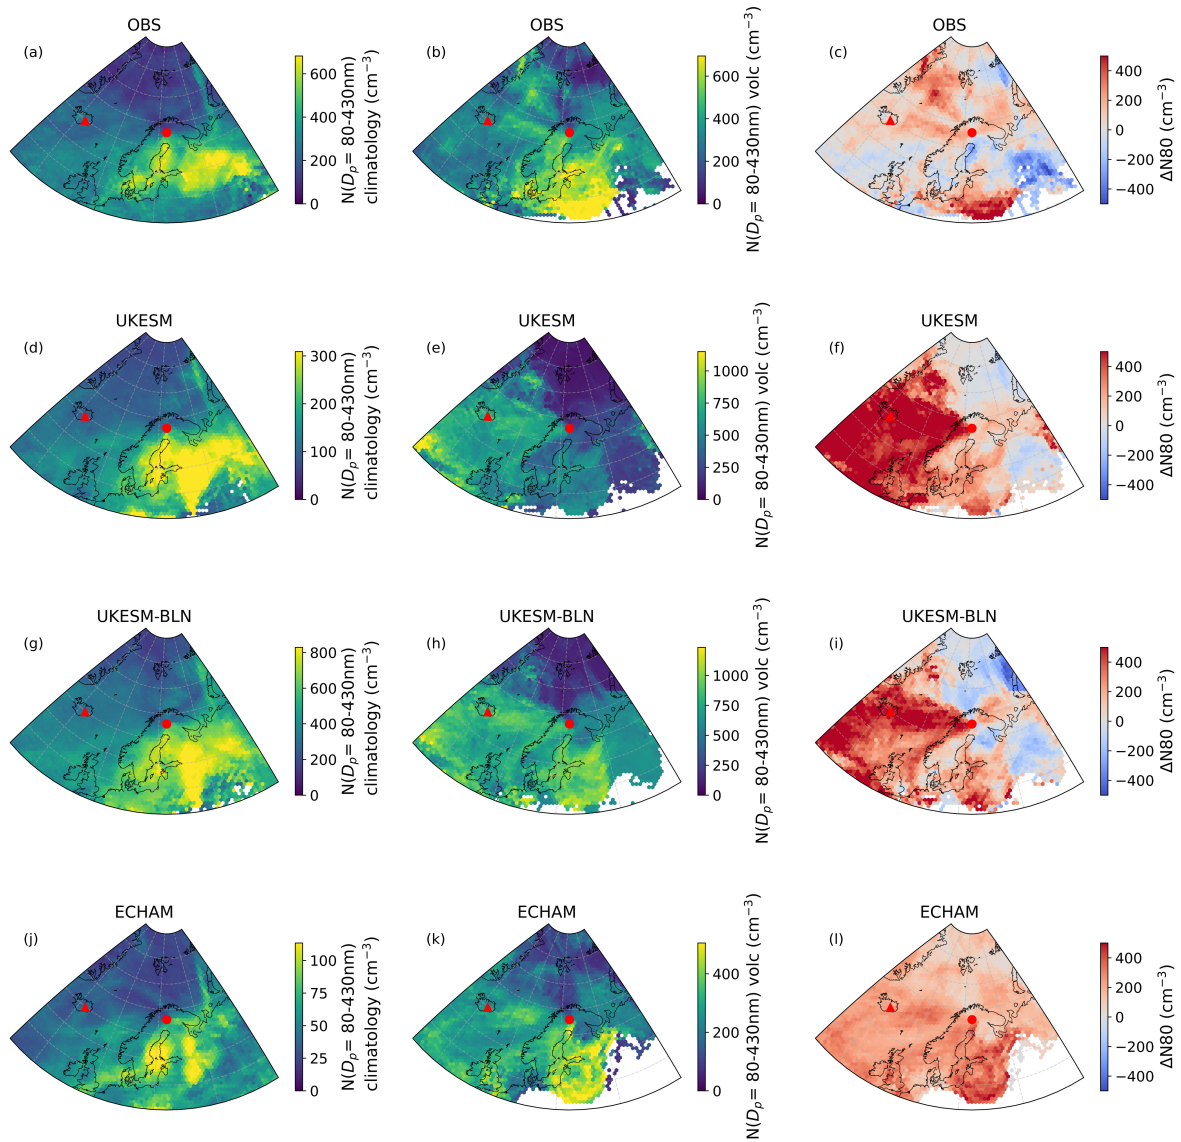

**Figure S11:** The mean per grid cell for the concentration of particles for  $D_p > 80\text{nm}$  (N80) at Pallas for the climatology (a, d, g and j), volcanic period (b, e, h and k) and the difference (volcanic period minus climatology) in concentration (c, f, i and l), utilising the concentration weighted trajectory model. For DMPS with ERA-Interim (a-c), UKESM1.0 (d-f), UKESM1.0-BLN10 (g-i) and ECHAM6.3-HAM2.3 (j-l). Note the difference in colour scale between subfigures.

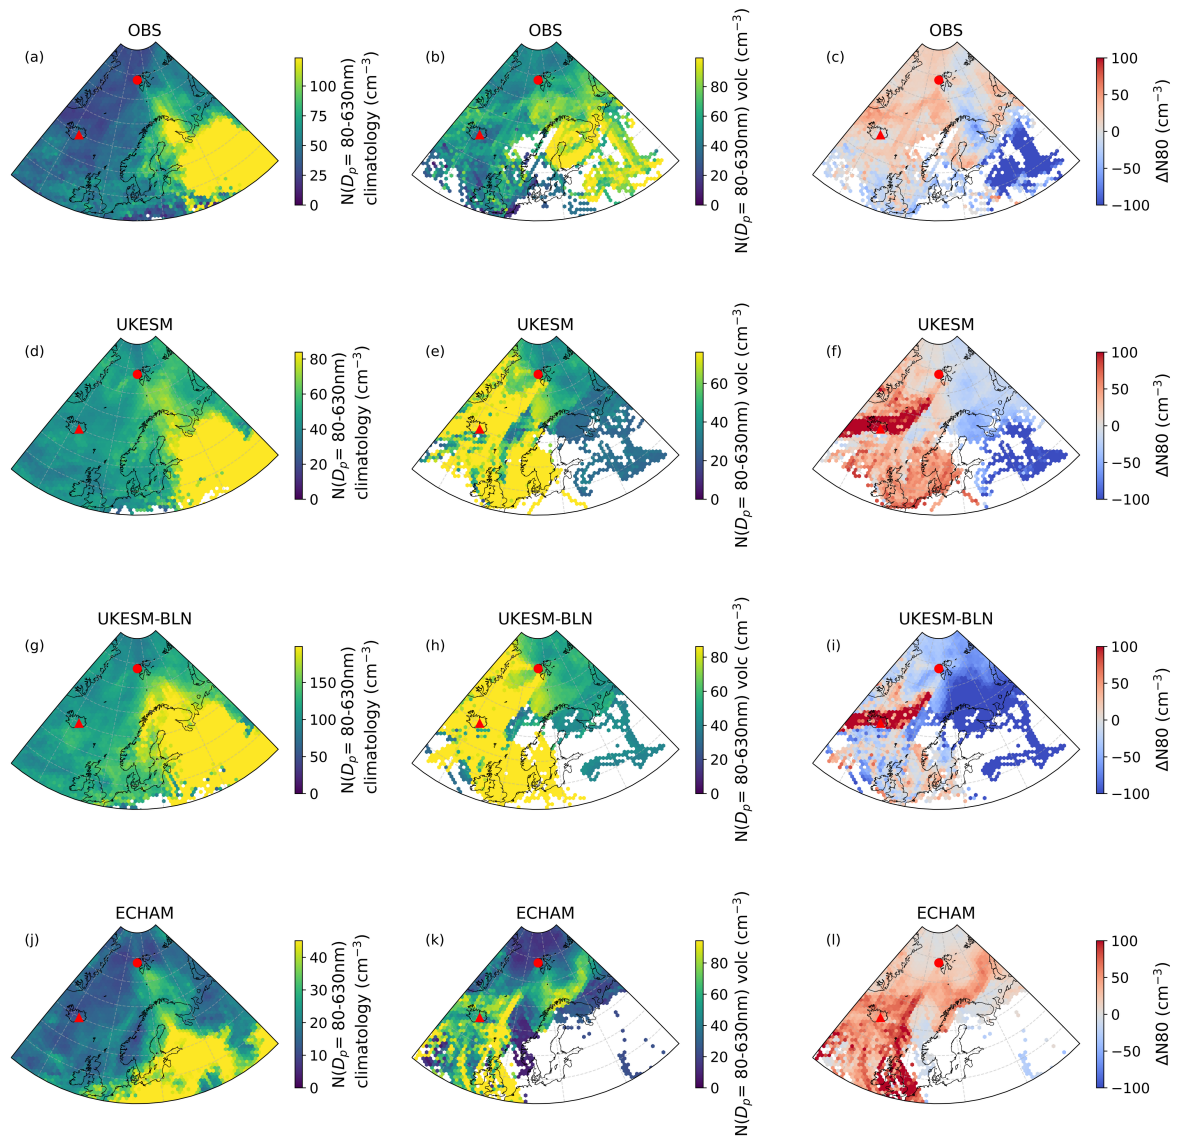

**Figure S12:** The mean per grid cell for the concentration of particles for  $D_p > 80\text{nm}$  (N80) at Zeppelin for the climatology (a, d, g and j), volcanic period (b, e, h and k) and the difference (volcanic period minus climatology) in concentration (c, f, i and l), utilising the concentration weighted trajectory model. For DMPS with ERA-Interim (a-c), UKESM1.0 (d-f), UKESM1.0-BLN10 (g-i) and ECHAM6.3-HAM2.3 (j-l). Note the difference in colour scale between subfigures.
